# Supplementary material
Source: Springer Nature journal article supplement (https://www.springermedizin.de/resource/supplementary/13058_2012_3231_MOESM5_ESM.pdf/9703566)

**A**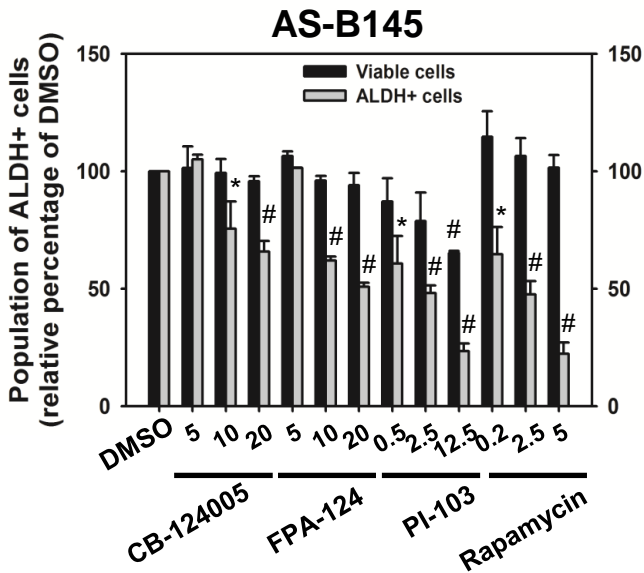**B**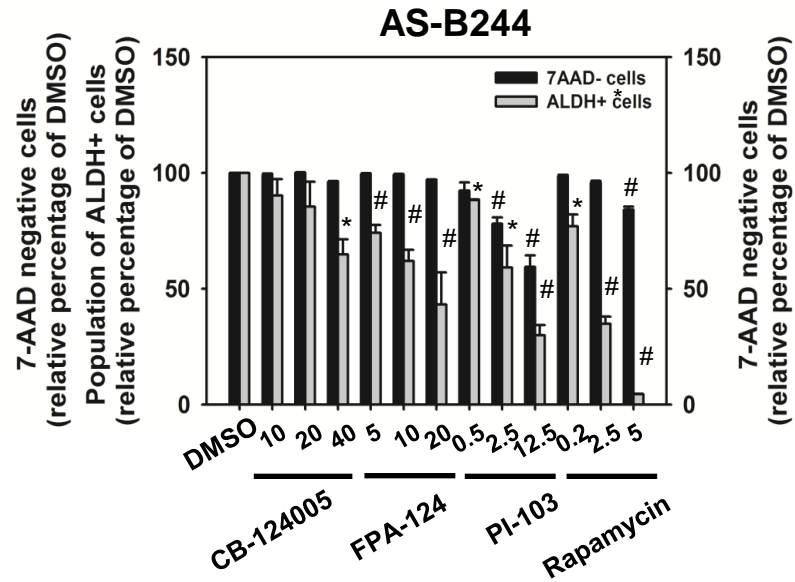**C**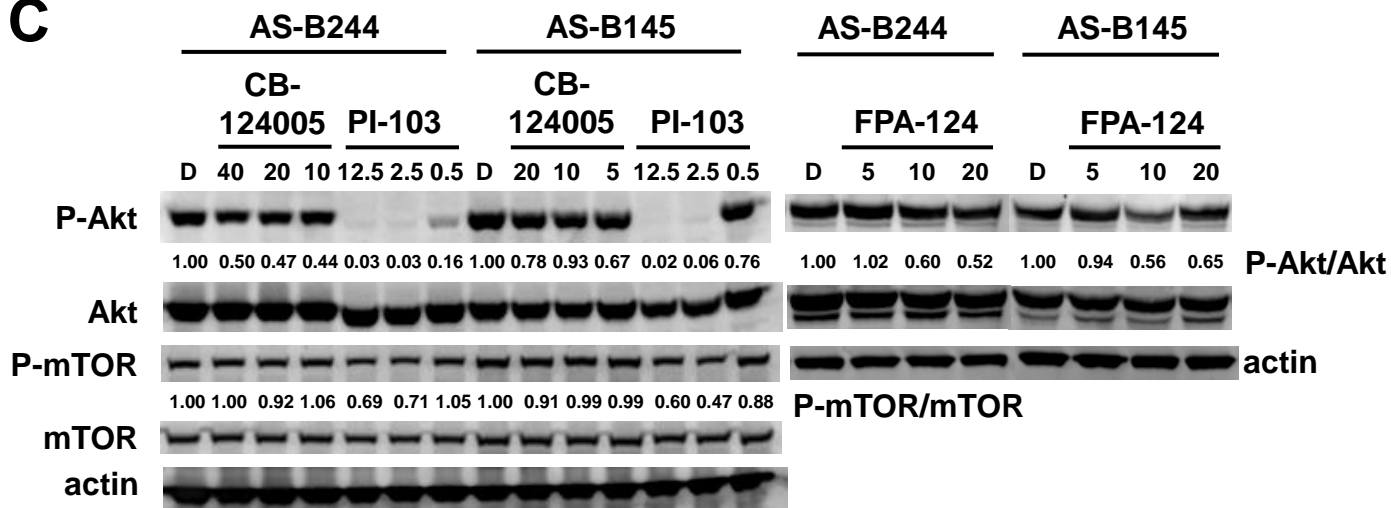

Supplement: MOESM5 [file 9703566]
